# Supplementary material
Source: PubMed Central journal article supplement (PMC2978284)
Supplement: NIHMS235227-supplement-Supp_Figure_S1-S9___Table_S1-S4.pdf [file NIHMS235227-supplement-Supp_Figure_S1-S9___Table_S1-S4.pdf]

## **Supplemental Information**

### **Nucleoid occlusion prevents cell division during replication fork arrest in *Bacillus subtilis***

Remi Bernard, Kathleen A. Marquis, and David Z. Rudner

## SUPPLEMENTAL FIGURE LEGENDS

**Figure S1.** TetR bound to *tetO* arrays causes cell division inhibition and cell death. Images before and after induction of a replication roadblock at +7° (81.7 kb from the origin of replication). Time (in min) after removal of the inducer (aTC) is indicated. Images show membranes stained with FM4-64 (red), DAPI-stained DNA (blue), and TetR-GFP (green) bound to (*tetO*)<sub>120</sub>. A phase contrast image shows cell lysis after 140 min. Similar results were obtained using TetR-YFP or TetR-CFP and with the *tetO* array at +130° (data not shown). White bar is 1 μm.

**Figure S2.** Replication of the left chromosome arm continues during a block on the right arm. Images of cells during a replication roadblock at +7° (81.7 kb from the origin of replication). Images show membranes stained with FM4-64 (red), DAPI-stained DNA (blue), and LacI-CFP bound to a small array of *lacO* operators at -7° (green). LacI-CFP binding to the *lacO* array does not impair replication (data not shown). The bottom set of images shows membranes (red) and TetR-YFP foci (green) to visualize the replication roadblock at +7°. Time (in min) after removal of aTC is indicated. White bar is 1 μm.

**Figure S3.** Genomic microarray analysis before and after replication roadblocks at +7° and +130°. Gene dosage (log<sub>2</sub>) relative to a reference DNA is shown on the y-axis. All the probed genes in the *B. subtilis* chromosome arranged from -188° to +172° (*ter-oriC-ter*) are shown (grey dots). The smooth line was generated by plotting the average gene dosage of the 25 genes before and 25 genes after each gene probed. Black arrows indicate the genomic positions surrounding the site of insertion of the *tetO* array. The red arrow indicates an increase in DNA content for genes located adjacent to the *ter* site on the blocked arm. Time (in min) after induction of the roadblock is indicated on the left. The upper panels are cells prior to the induction of the roadblock. The lower panels are after induction of the roadblock. Schematic representations of the two conditions are shown to the left of the graphs.

**Figure S4.** Efficient origin segregation after release of the replication roadblock. Images show a strain harboring LacI-CFP and a small *lacO* array inserted adjacent to the origin at –

7°. This strain also contains TetR-YFP and a *tetO* array at +7° that is capable of blocking replication. The replication roadblock was induced as described previously for 90 min. aTC was added to the culture to release the replication roadblock and cells were visualized by fluorescence microscopy. Images show FM4-64 stained membranes (red), DAPI-stained DNA, and LacI-CFP (false-colored green) bound to a small lacO array at -7°. Time (in min) after releasing the roadblock is indicated. Segregated nucleoids (green carets) and cell division events (yellow carets) are highlighted. White bar is 1  $\mu$ m.

**Figure S5.** Comparison of RecA-GFP foci and filaments during treatment with HPUra and after induction of the replication roadblock. Time (in min) after addition of HPUra or removal of aTC is indicated. Images show RecA-GFP (green), FM4-64 stained membranes (red) and DAPI-stained DNA (blue).

**Figure S6.** Cell division inhibition during fork arrest does not require the SOS response. Representative fields of cells containing wild-type LexA or an uninducible LexA mutant (LexA<sup>ind-</sup>) (Fabret et al., 2002) following treatment with HPUra (upper panels) or after induction of a replication roadblock (lower panels). Membranes were visualized with FM4-64. Time (in min) after drug treatment or induction of the roadblock is indicated. Average cell lengths and standard deviations of 500 cells for each strain are shown. White bar is 1  $\mu$ m.

**Figure S7.** Transcriptional repression of *ftsL* does not contribute to cell division inhibition during the replication roadblock. Cells harboring an IPTG-inducible promoter fusion to *ftsL* ( $P_{spac}$ -*ftsL*) and cells containing wild-type *ftsL* were subjected to the replication roadblock as described previously with the only difference that the medium used for pre-culture, washing, and growth was supplemented with 1mM IPTG to maintain expression of *ftsL*. At time points after induction of the roadblock, cells were visualized by fluorescence microscopy using the membrane dye FM4-64 and cell length was quantified. Histograms show length distributions at indicated time (in min). >1000 cells were measured for each strain and each time point.

**Figure S8.** Cells lacking Spo0J have a greater size distribution than wild-type during fork arrest. The replication roadblock was induced as described previously in isogenic strains with (black) or without (grey) Spo0J. Cells were visualized by fluorescence microscopy using the membrane dye FM4-64 and cell length was quantified. Histograms show length distributions at 90 minutes after induction of the roadblock. Cells smaller than  $5\mu\text{m}$  were binned together to highlight the increased number of small cells in the Spo0J mutant strain. >1500 cells were measured for each strain.

**Figure S9.** The SMC condensin complex is partially mislocalized in the absence of Spo0J during fork arrest. Images show the localization of ScpB-YFP (a subunit of the SMC condensin complex) during the replication roadblock in the presence or absence of Spo0J. The replication roadblock was induced as described previously and cells were visualized by fluorescence microscopy. Images show representative fields obtained 90 min after removal of aTC with ScpB-YFP (false-colored green), FM4-64-stained membranes (red), DAPI-stained DNA (blue). Septa that bisect the DNA mass in the absence of Spo0J are highlighted (yellow carets). White bar is  $1\mu\text{m}$ .

Figure S1  
Bernard et al.

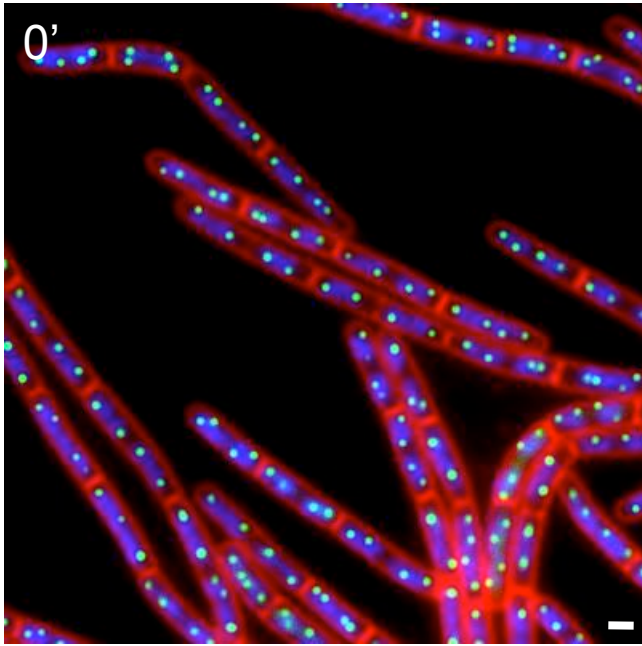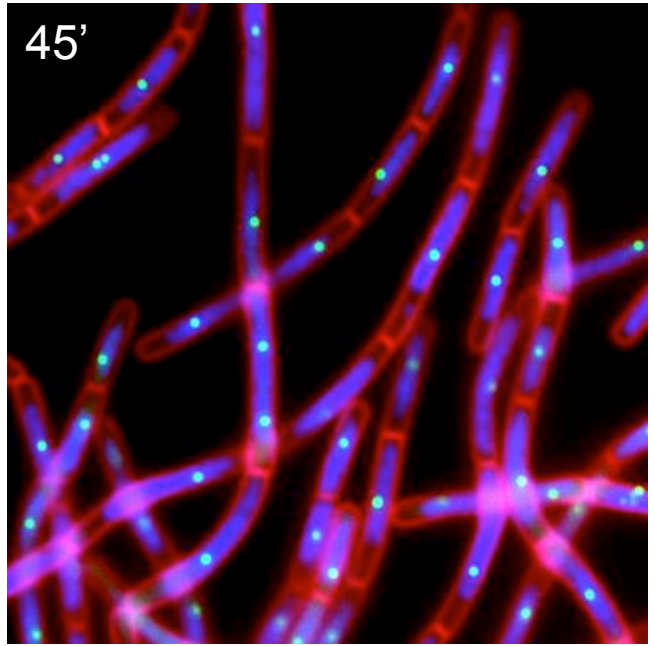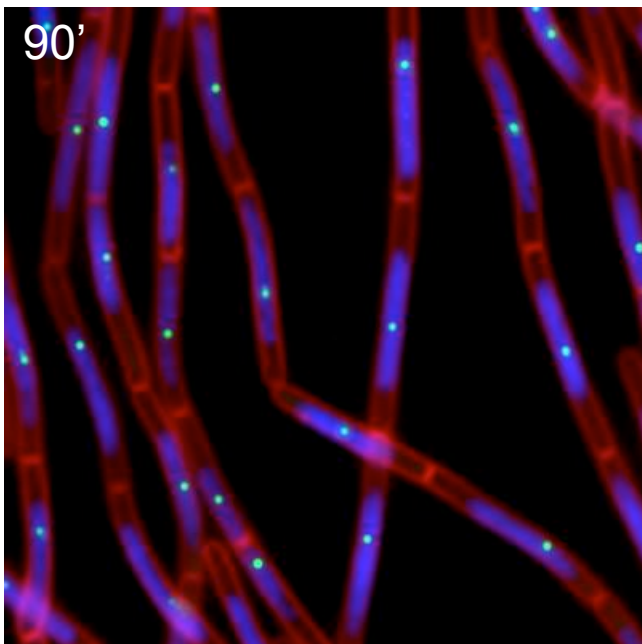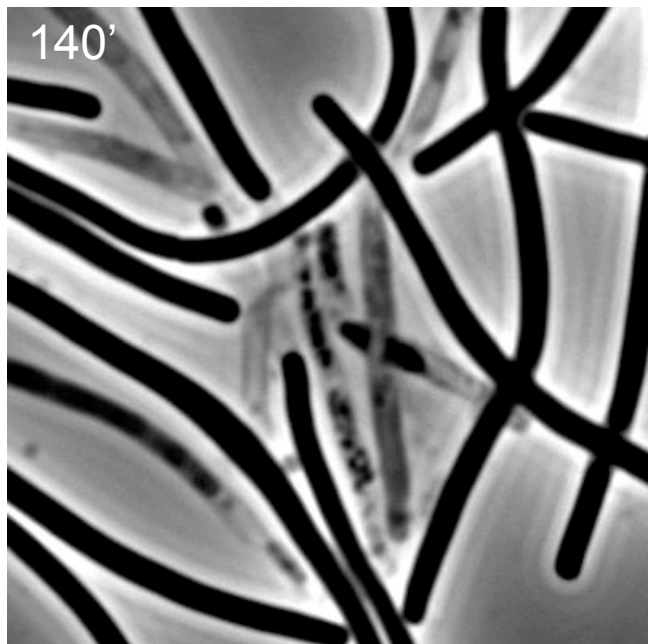

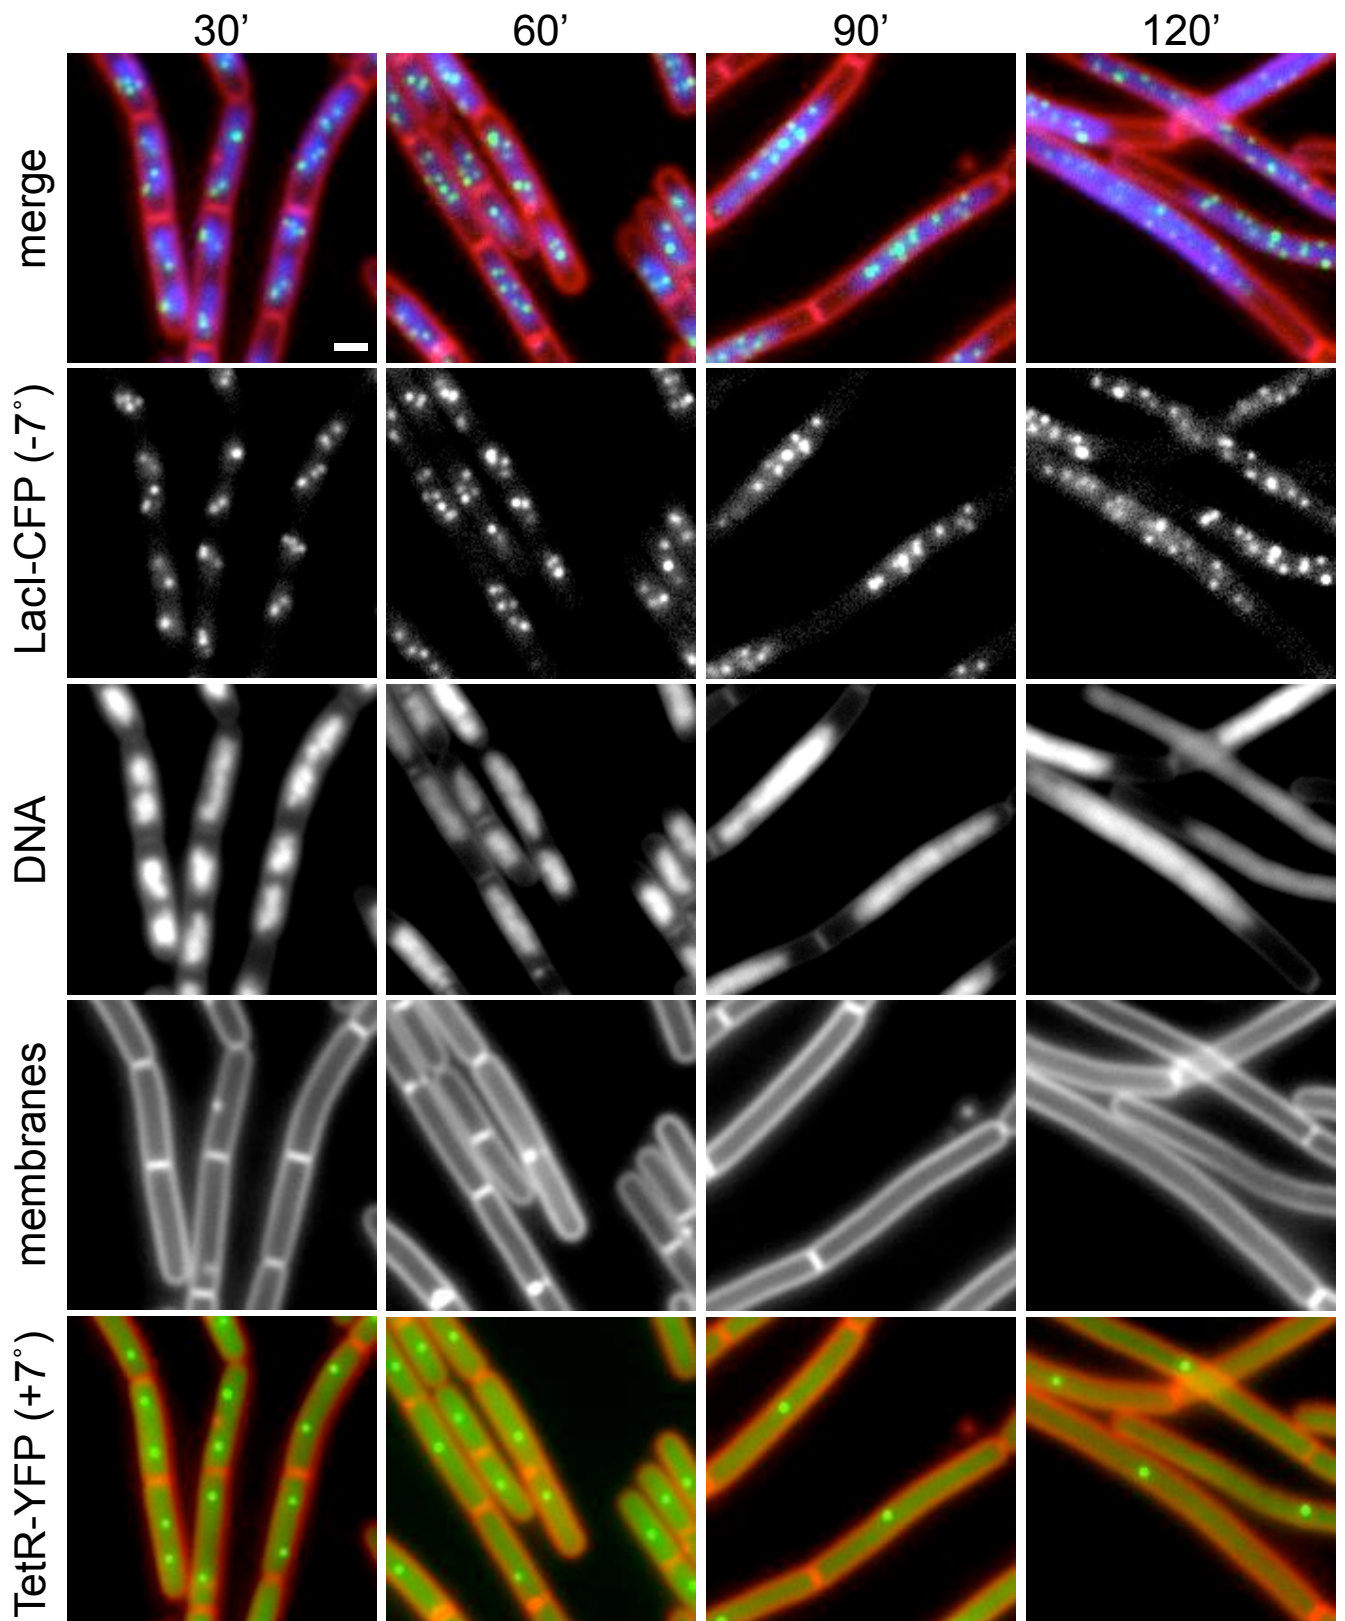

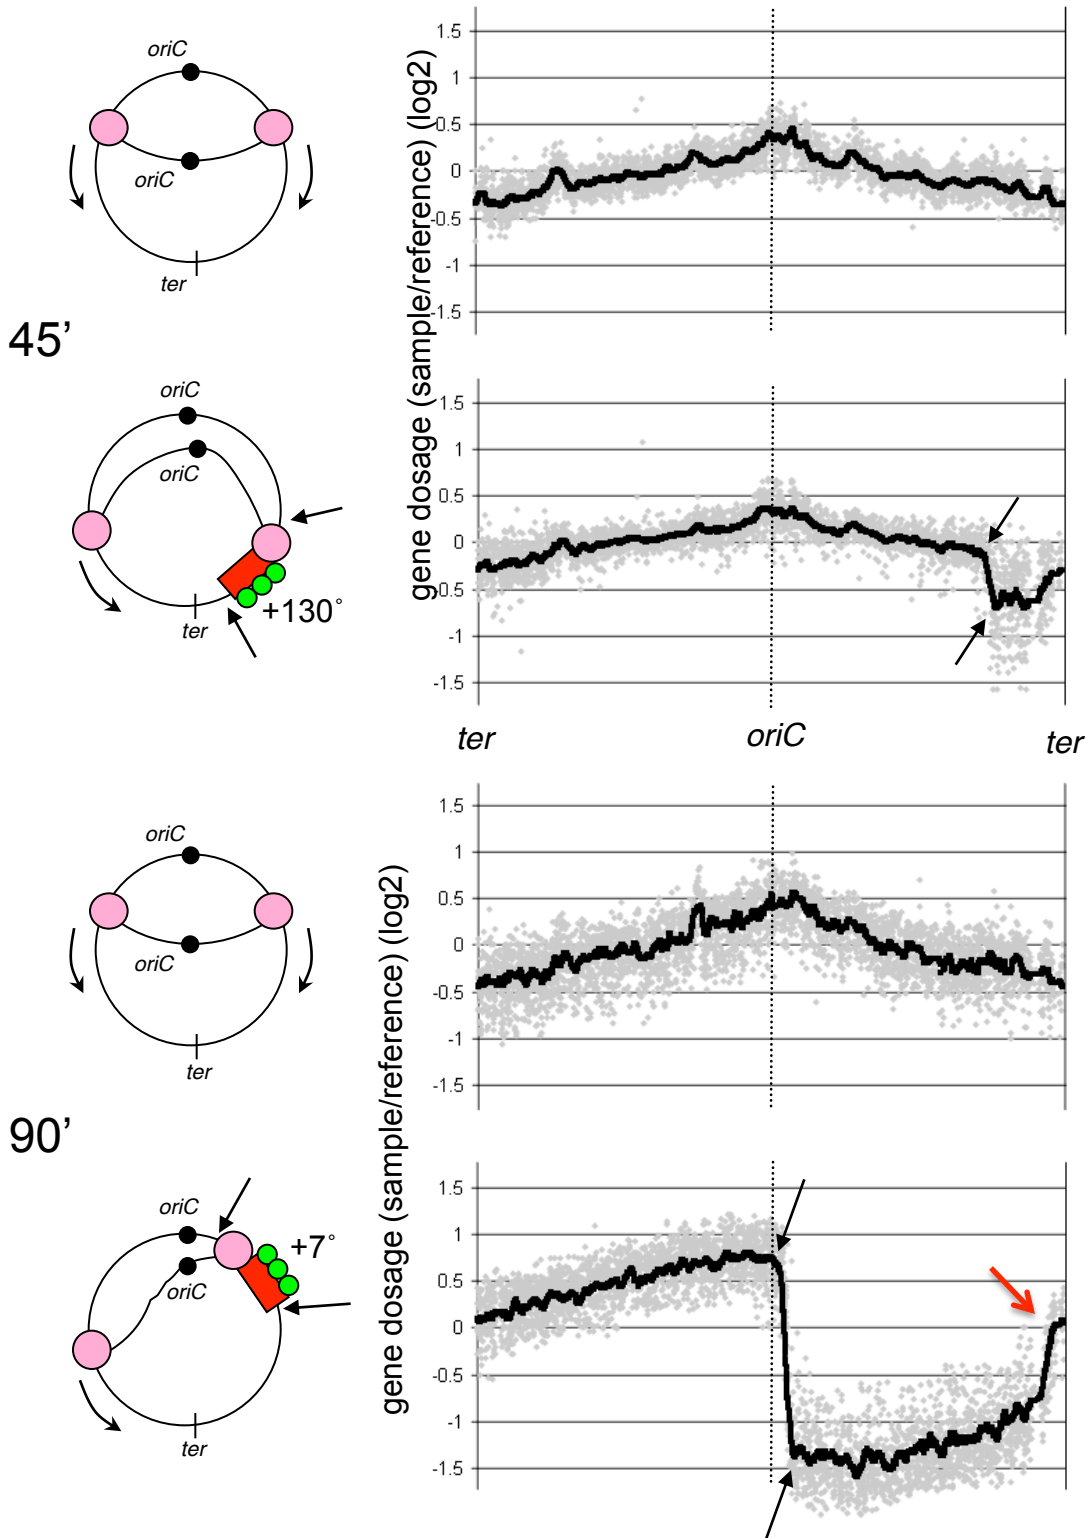



Figure S4  
Bernard et al.

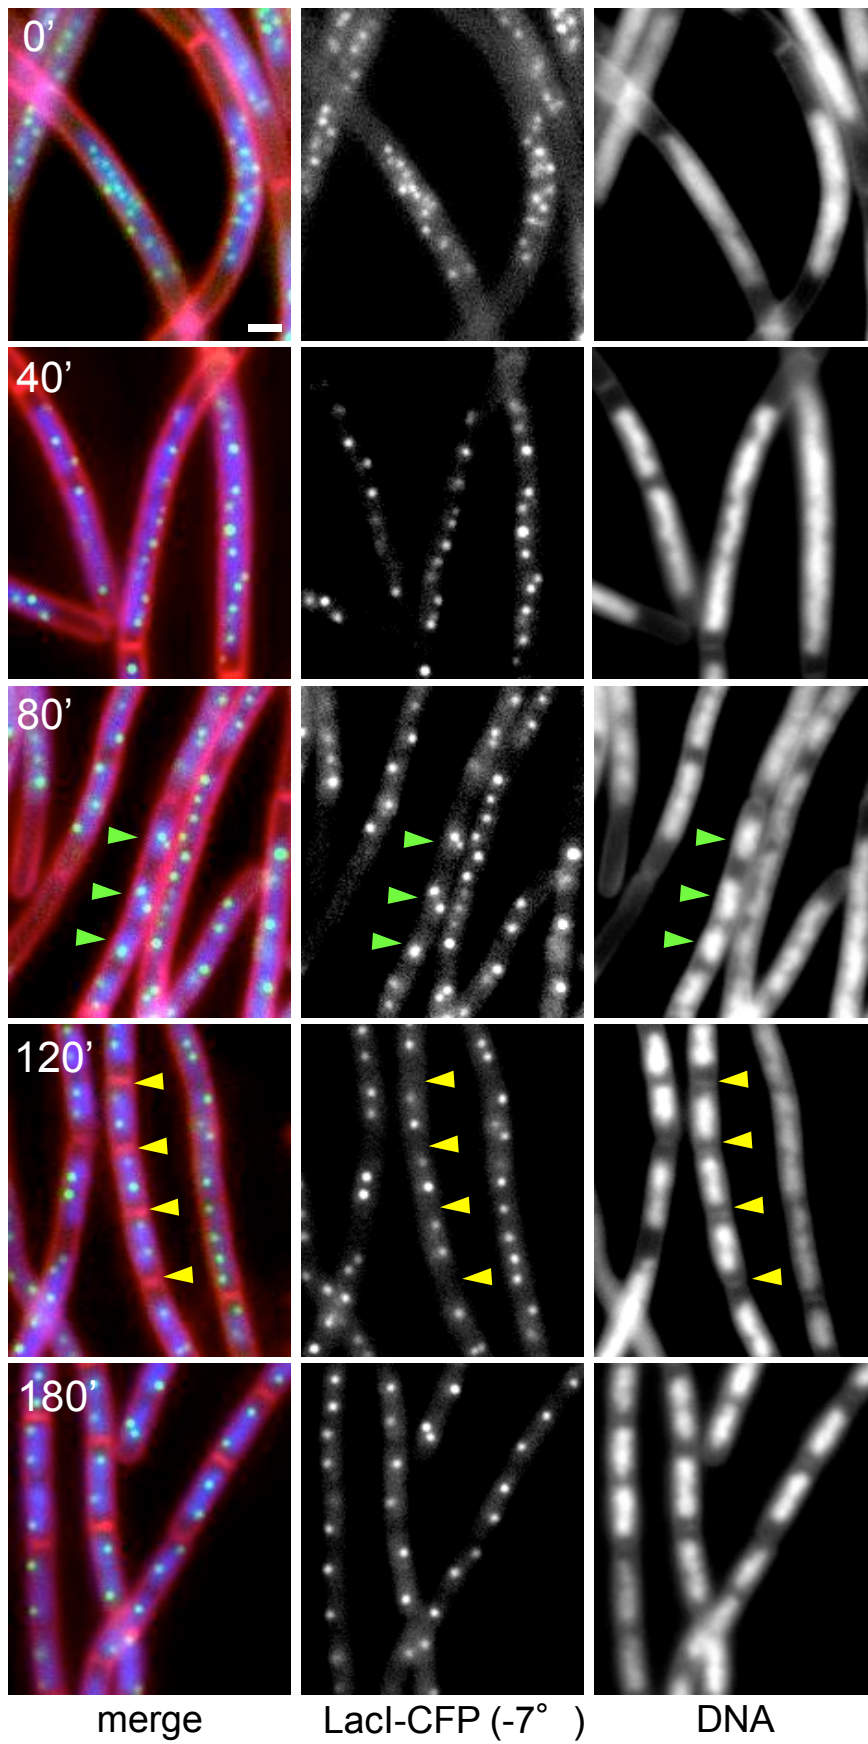



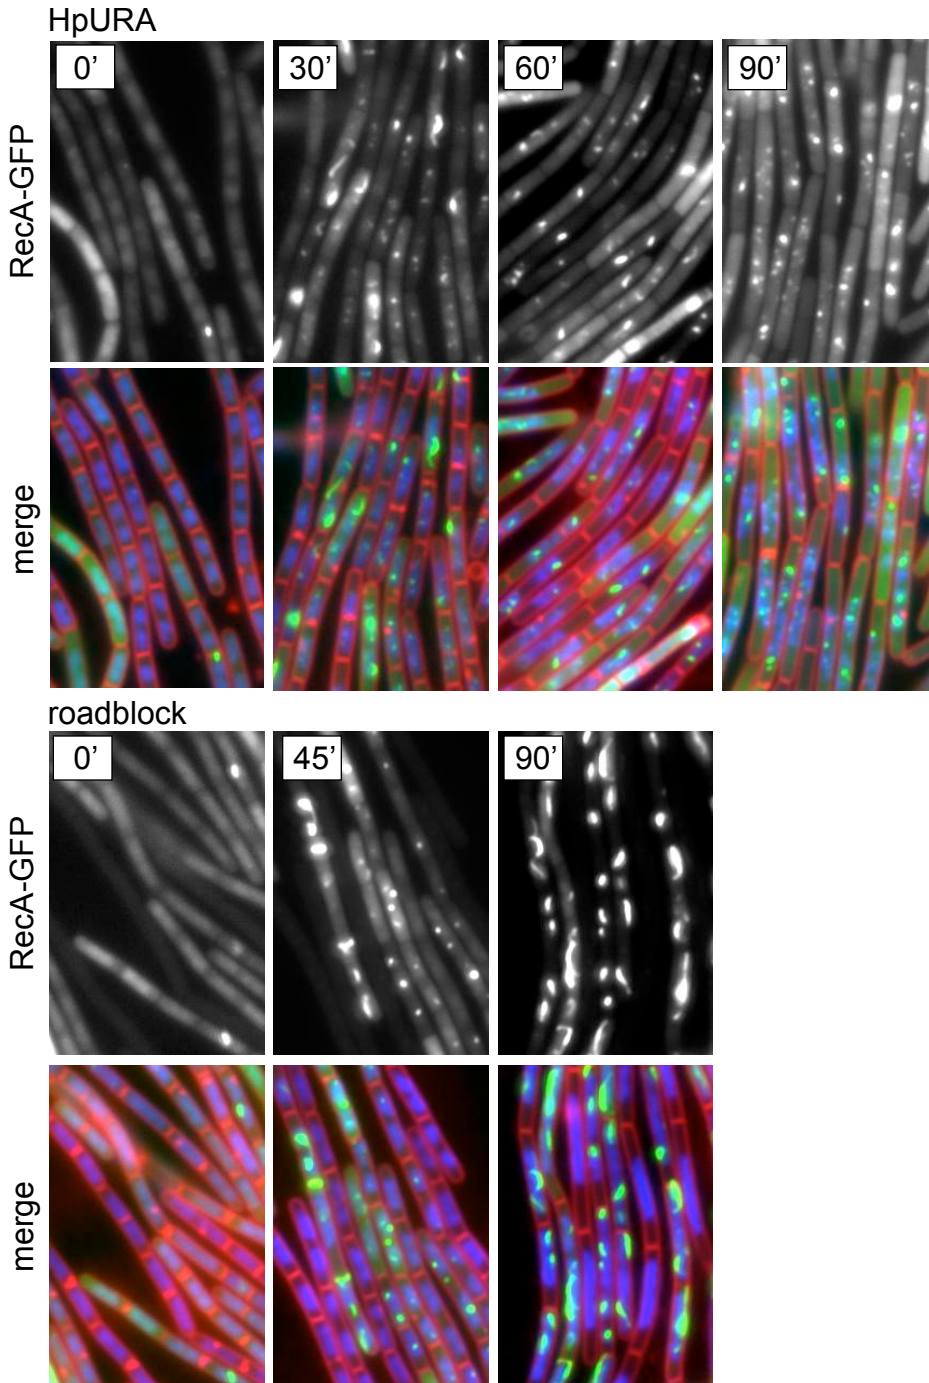

HPUra

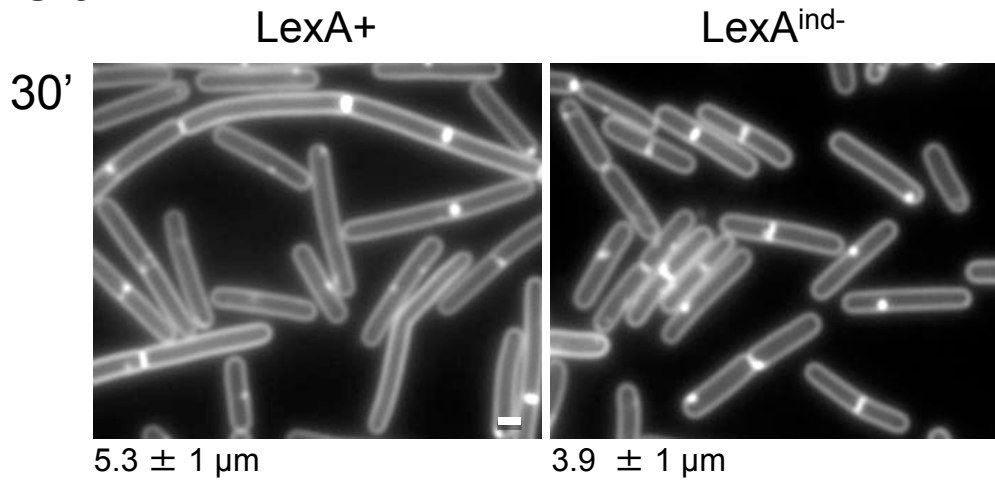

replication roadblock

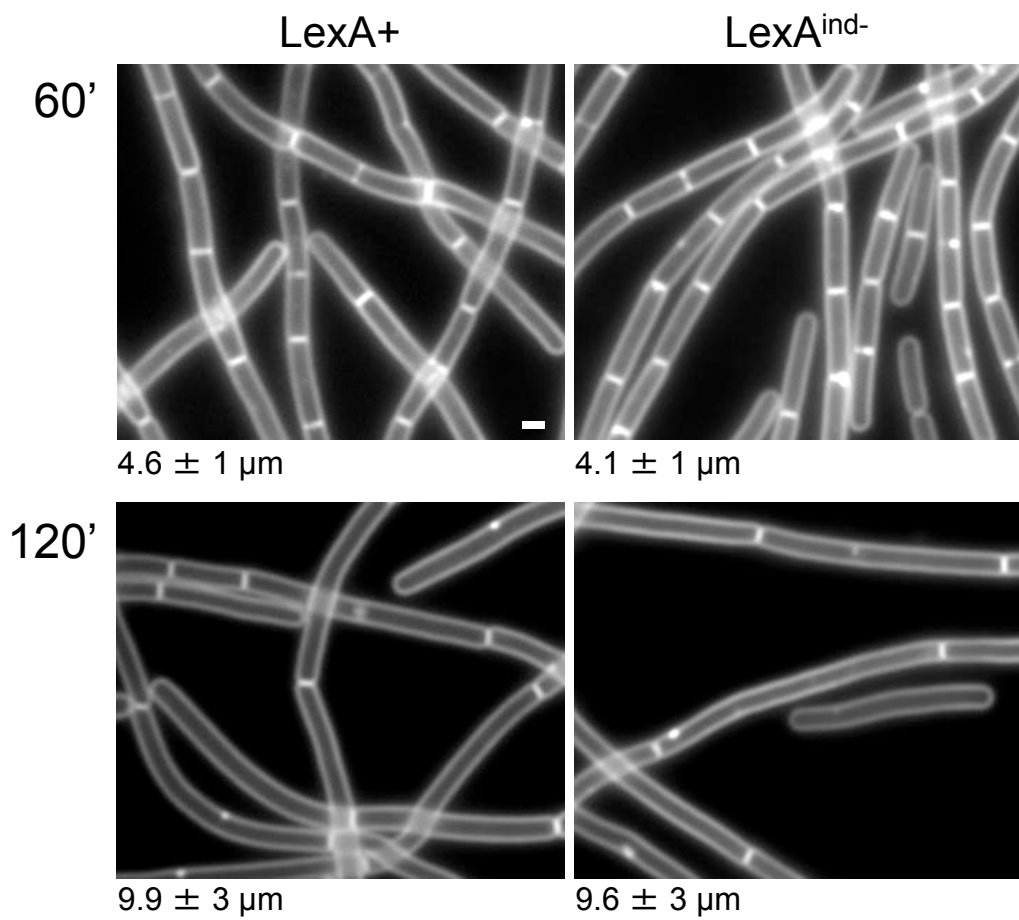

Figure S7  
Bernard et al.

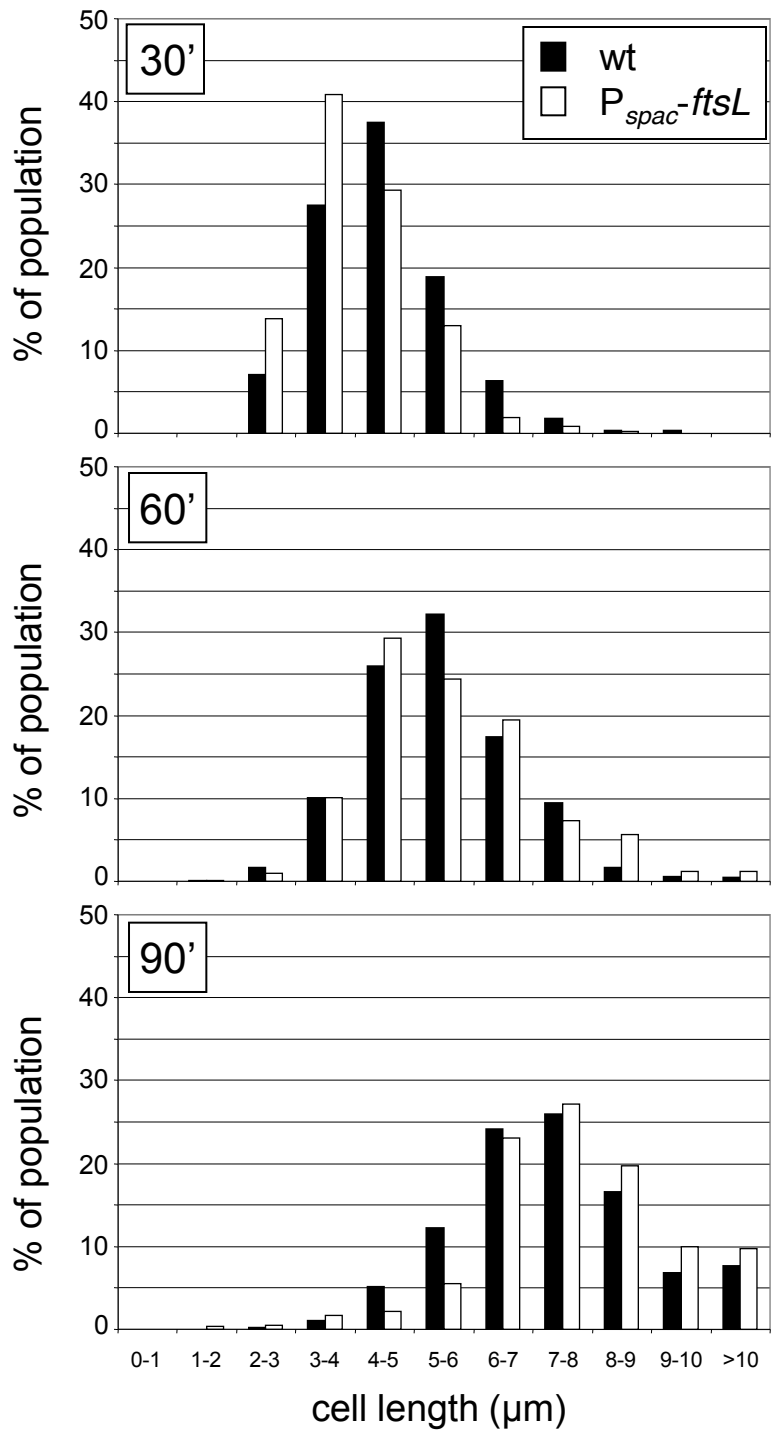

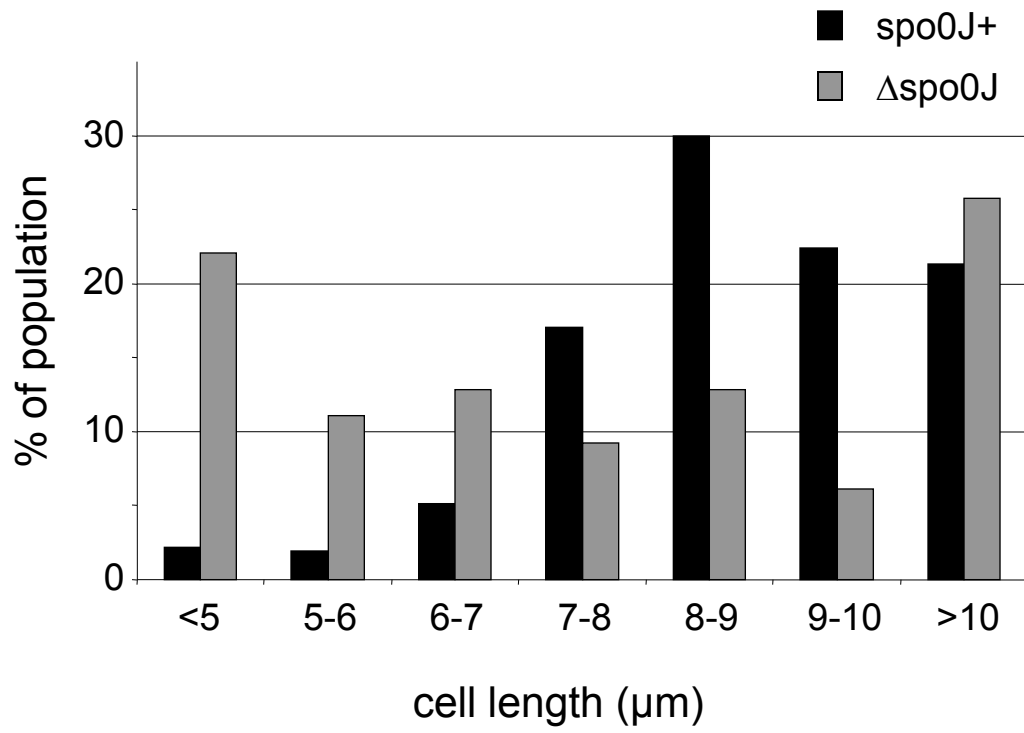

### ScpB-YFP

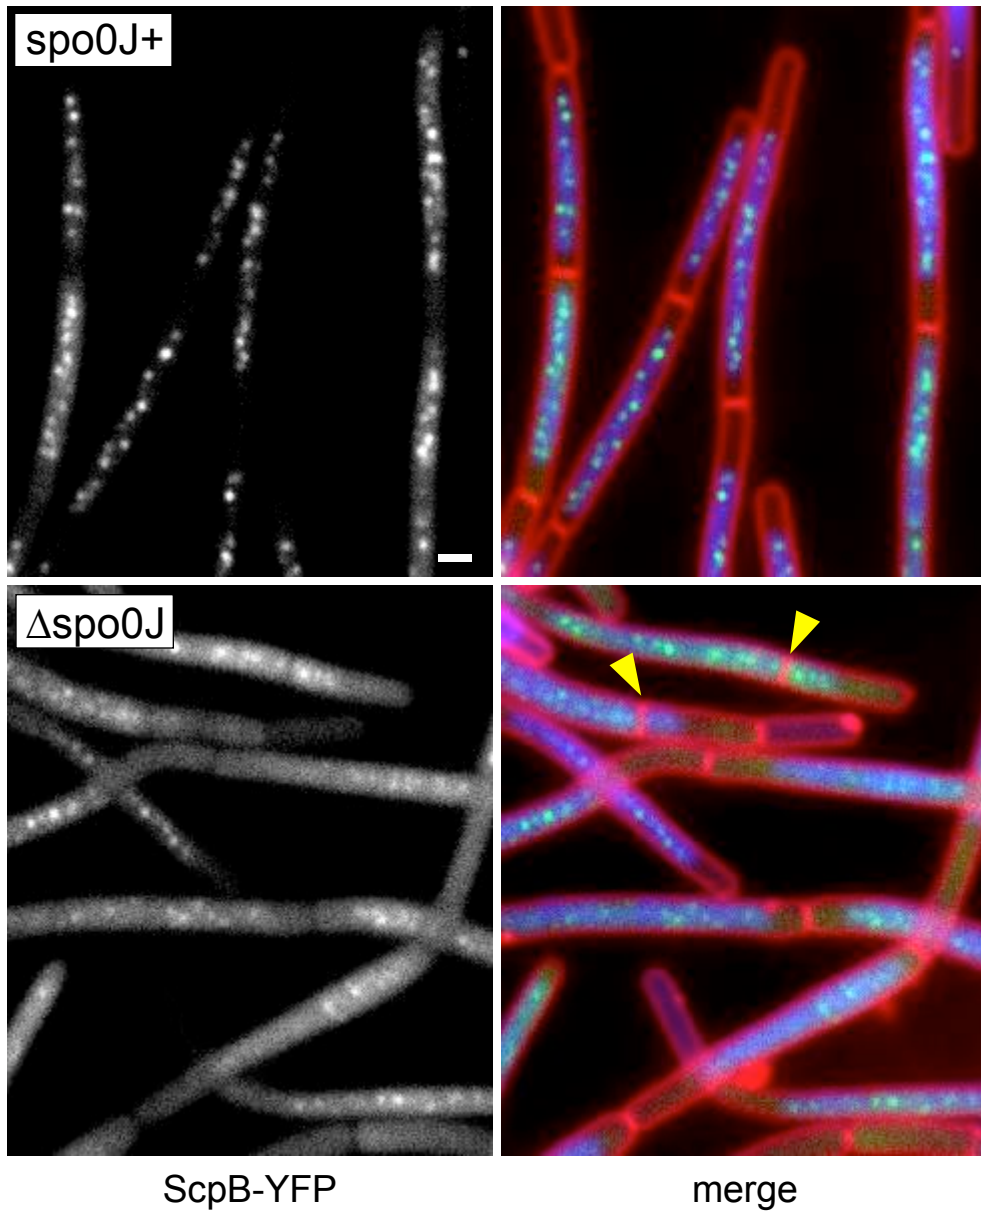

## Induced genes

| genes       | Fold change $\pm$ SD | Function or putative function                          |
|-------------|----------------------|--------------------------------------------------------|
| <i>ypvA</i> | 2.95 $\pm$ 2.5       | Unknown, putative DNA helicase                         |
| <i>cotD</i> | 2.79 $\pm$ 0.8       | Spore coat                                             |
| <i>proH</i> | 2.57 $\pm$ 2.3       | Metabolism                                             |
| <i>yqxJ</i> | 2.49 $\pm$ 1.4       | Unknown                                                |
| <i>yqfW</i> | 2.39 $\pm$ 1.0       | Unknown                                                |
| <i>scpA</i> | 2.34 $\pm$ 0.9       | Condensin complex                                      |
| <i>yxaI</i> | 2.32 $\pm$ 1.1       | Unknown                                                |
| <i>ywbH</i> | 2.19 $\pm$ 1.2       | Unknown                                                |
| <i>ytbJ</i> | 2.17 $\pm$ 1.0       | Unknown                                                |
| <i>yphF</i> | 2.16 $\pm$ 0.5       | Unknown                                                |
| <i>lonA</i> | 2.16 $\pm$ 1.1       | Protease                                               |
| <i>ansR</i> | 2.15 $\pm$ 0.7       | Metabolism                                             |
| <i>fur</i>  | 2.14 $\pm$ 1.0       | Iron uptake                                            |
| <i>yxbB</i> | 2.07 $\pm$ 0.9       | Unknown                                                |
| <i>ruvA</i> | 2.06 $\pm$ 0.8       | SOS-induced, recombinational repair                    |
| <i>swrA</i> | 1.95 $\pm$ 0.3       | Motility                                               |
| <i>yrvM</i> | 1.95 $\pm$ 0.7       | Unknown                                                |
| <i>yaaK</i> | 1.93 $\pm$ 0.6       | Unknown                                                |
| <i>yqeG</i> | 1.93 $\pm$ 0.7       | Unknown                                                |
| <i>amyC</i> | 1.92 $\pm$ 0.8       | Metabolism                                             |
| <i>ypsC</i> | 1.92 $\pm$ 0.4       | Unknown                                                |
| <i>yqkE</i> | 1.90 $\pm$ 0.2       | Unknown                                                |
| <i>yphE</i> | 1.89 $\pm$ 0.4       | Unknown                                                |
| <i>rocR</i> | 1.81 $\pm$ 0.5       | Metabolism                                             |
| <i>yqfS</i> | 1.79 $\pm$ 0.6       | putative endonuclease                                  |
| <i>dnaD</i> | 1.79 $\pm$ 0.6       | DNA replication, helicase loader                       |
| <i>yvcL</i> | 1.78 $\pm$ 0.3       | Unknown                                                |
| <i>ytmQ</i> | 1.76 $\pm$ 0.6       | Unknown                                                |
| <i>yqfR</i> | 1.75 $\pm$ 0.5       | putative RNA helicase                                  |
| <i>uvrB</i> | 1.72 $\pm$ 0.3       | SOS-induced, Excision repair                           |
| <i>yqfF</i> | 1.70 $\pm$ 0.5       | Unknown                                                |
| <i>bbpA</i> | 1.70 $\pm$ 0.5       | Cell wall, PBP2a                                       |
| <i>sspA</i> | 1.69 $\pm$ 0.6       | Small spore protein SspA                               |
| <i>degU</i> | 1.68 $\pm$ 0.4       | Global regulator                                       |
| <i>yyaQ</i> | 1.67 $\pm$ 0.2       | Unknown                                                |
| <i>ypsA</i> | 1.65 $\pm$ 0.3       | Unknown                                                |
| <i>yvcK</i> | 1.65 $\pm$ 0.1       | Unknown                                                |
| <i>yqjE</i> | 1.64 $\pm$ 0.6       | Unknown                                                |
| <i>ypbG</i> | 1.62 $\pm$ 0.2       | Unknown                                                |
| <i>Obg</i>  | 1.62 $\pm$ 0.5       | General stress response, essential GTP binding protein |
| <i>dgkA</i> | 1.61 $\pm$ 0.3       | Cell wall, diacylglycerol kinase                       |
| <i>ywfO</i> | 1.60 $\pm$ 0.1       | Unknown                                                |

## Repressed genes

| genes       | Fold change $\pm$ SD | Function or putative function    |
|-------------|----------------------|----------------------------------|
| <i>ykgA</i> | - 4.63 $\pm$ 0.8     | Unknown, general stress response |
| <i>hag</i>  | - 3.32 $\pm$ 0.6     | Flagellin, motility              |
| <i>ykgB</i> | - 3.04 $\pm$ 0.9     | Unknown, operon with <i>ykgA</i> |
| <i>ylaL</i> | - 2.88 $\pm$ 0.2     | Unknown                          |
| <i>prkC</i> | - 2.81 $\pm$ 0.5     | Kinase, cell growth              |
| <i>ykzL</i> | - 2.58 $\pm$ 0.6     | Unknown                          |
| <i>yloV</i> | - 2.44 $\pm$ 0.3     | Unknown                          |
| <i>yloN</i> | - 2.23 $\pm$ 0.8     | Unknown                          |
| <i>yknX</i> | - 2.23 $\pm$ 0.3     | Unknown, general stress response |
| <i>ykqC</i> | - 2.17 $\pm$ 0.6     | Rnase J1, essential              |
| <i>yisN</i> | - 1.80 $\pm$ 0.2     | Unknown                          |
| <i>ylaF</i> | - 1.74 $\pm$ 0.4     | Unknown                          |
| <i>yonV</i> | - 1.72 $\pm$ 0.1     | Unknown                          |
| <i>ykrP</i> | - 1.67 $\pm$ 0.1     | Unknown                          |
| <i>yloU</i> | - 1.61 $\pm$ 0.1     | Unknown                          |

**Table S2**  
Strains Used in this study

| Strain  | Genotype                                                                                                                                  | Reference           |
|---------|-------------------------------------------------------------------------------------------------------------------------------------------|---------------------|
| BDR11   | wild-type (PY79)                                                                                                                          | Youngman et al,1983 |
| BRB1    | <i>amyE::P<sub>spac(C)</sub>-tetR-gfp (spec), 130°Ω (tetO)<sub>120</sub> (cat)</i>                                                        | This work           |
| BRB12   | <i>(yneA-yneB-ynzC)::erm</i>                                                                                                              | This work           |
| BRB35   | <i>(yneA-yneB-ynzC)::phleo, amyE::P<sub>spac(C)</sub>-tetR-gfp(spec), 130°Ω (tetO)<sub>120</sub> (cat)</i>                                | This work           |
| BRB63   | <i>amyE::P<sub>spac(C)</sub>-tetR-gfp (spec), 7°Ω (tetO)<sub>120</sub> (cat)</i>                                                          | This work           |
| BRB73   | <i>noc::tet</i>                                                                                                                           | Wu Errington, 2004  |
| BRB89   | <i>noc::tet, (yneA-yneB-ynzC)::erm</i>                                                                                                    | This work           |
| BRB114  | <i>noc::tet, (yneA-yneB-ynzC)::erm, amyE::P<sub>spac(C)</sub>-tetR-gfp (spec), 130°Ω (tetO)<sub>120</sub> (cat)</i>                       | This work           |
| BRB117  | <i>noc::tet, amyE::P<sub>spac(C)</sub>-tetR-gfp (spec), 130°Ω (tetO)<sub>120</sub> (cat)</i>                                              | This work           |
| BRB150  | <i>amyE::P<sub>spac(C)</sub>-tetR-gfp (spec), 7°Ω (tetO)<sub>120</sub> (Phleo)</i>                                                        | This work           |
| BRB175  | <i>yndNΩ pRB033a (kan), sacA::P<sub>yneA</sub>-cfp (erm)</i>                                                                              | This work           |
| BRB190  | <i>yndNΩ pRB033a (kan), sacA::P<sub>yneA</sub>-cfp (erm), amyE::P<sub>spac(C)</sub>-tetR-yfp (spec), 7°Ω (tetO)<sub>120</sub> (cat)</i>   | This work           |
| BRB206  | <i>noc::tet, amyE::P<sub>spac(C)</sub>-tetR-gfp (spec), 7°Ω (tetO)<sub>120</sub> (cat)</i>                                                | This work           |
| BRB225  | <i>Δ(soj-spo0J)::cat, thrC::soj<sup>+</sup> (erm), amyE::P<sub>spac(C)</sub>-tetR-gfp (spec), 7°Ω (tetO)<sub>120</sub> (phleo)</i>        | This work           |
| BRB291  | <i>(zapA-yshB)::tet, yhdG::P<sub>zylA</sub>-zapA-yfp (erm), amyE::P<sub>spac(C)</sub>-tetR-cfp (spec), 7°Ω (tetO)<sub>120</sub> (cat)</i> | This work           |
| BRB359  | <i>P<sub>spac-smc</sub> (cat) Ω, yhdG::P<sub>per</sub>-tetR-gfp (spec), 7°Ω (tetO)<sub>120</sub> (phleo)</i>                              | This work           |
| BRB636  | <i>recA-gfp-mut2(A206K) (spec), yhdG::P<sub>spac(C)</sub>-tetR-cfp (erm), 7°Ω (tetO)<sub>120</sub> (phleo)</i>                            | This work           |
| BNS1733 | <i>dnaB134 (ts) zhb-83::Tn917 (erm)</i>                                                                                                   | Wagner et al, 2009  |
| BDR2429 | <i>recA-gfp-mut2(A206K) (spec)</i>                                                                                                        | Simmons et al, 2009 |



**Table S3**

Plasmids used in this study

| <b>plasmid</b> | <b>description</b>                | <b>reference</b>    |
|----------------|-----------------------------------|---------------------|
| pRB012         | $\Delta(yneA-yneB-ynzC)::phleo$   | This work           |
| pRB013         | $\Delta(yneA-yneB-ynzC)::erm$     | This work           |
| pRB015         | $sacA::P_{yneA}-cfp (erm)$        | This work           |
| pRB020         | +7° $\Omega (tetO)_{120} (cat)$   | This work           |
| pRB032         | +7° $\Omega (tetO)_{120} (phleo)$ | This work           |
| pRB033         | $yndN \Omega kan$                 | This work           |
| pRB046         | $yhdG::P_{xyIA}-zapA-yfp (erm)$   | This work           |
| pKM218         | +130° $\Omega (tetO)_{120} (cat)$ | Marquis et al, 2008 |

**Table S4** Oligonucleotides used in this study

| <b>Primer</b> | <b>Sequence</b>                                        |
|---------------|--------------------------------------------------------|
| oRB001        | cgcGAATTCccattgtcgtgtgtttgc                            |
| oRB002        | cgcGGATCCtcatgatcataacctccaacag                        |
| oRB003        | cgccGTCGACgaggaatacggcaatatcgattc                      |
| oRB004        | cctgCGGCcgactacgttaaataatgaatcgcg                      |
| oRB005        | gcttcatcatcttctgtcatcg                                 |
| oRB006        | tccattaaatcaccatcaccgc                                 |
| oRB010        | gccgCAATTGttaaactttatcaacagaagcgg                      |
| oRB011        | cggAAGCTTattattgctgccataagcaac                         |
| oRB014        | gccGAATTCcaaaccggccaatggc                              |
| oRB015        | ggcAAGCTTaaacaggaatgtttgttcgc                          |
| oRB018        | cgcGGATCCgtactcgagatcatggaacattacctgagc                |
| oRB019        | cgcGAATTCatgattggcggcactactg                           |
| oRB029        | caggattcttagccgtgattc                                  |
| oRB032        | gcacagatgcgtaaggagaaaatac                              |
| oRB035        | gccGAATTCggcatcgttgaacaagtccgg                         |
| oRB036        | cgcGGATCCgaaccagacatcccagaaatgac                       |
| oRB039        | cgcaAAGCTTAcataaggaggaaactactatgtctgacggcaaaaaacaaaaac |
| oRB040        | cggCTCGAGatccttttcttaagctgacgctc                       |
| oDR078        | gccGGATCCttattgtatagttcatccatgcc                       |
| oDR079        | gcgCTCGAGggttccggaatgag                                |
| oDR699        | gcgtcGAATTCccggtggaacgaggtcatc                         |
| oDR700        | cgcaAAGCTTtgaatattgattgatcgaaccag                      |

restriction endonuclease sites are capitalized
